# Supplementary material
Source: PubMed Central journal article supplement (PMC7081145)
Supplement: jamasurg-155-380-s002.pdf [file jamasurg-155-380-s002.pdf]

## Supplementary Online Content

Prabhu AS, Carbonell A, Warren J, et al. Robotic inguinal vs transabdominal laparoscopic inguinal hernia repair: the RIVAL randomized clinical trial. *JAMA Surg*. Published online March 18, 2020. doi:10.1001/jamasurg.2020.0034

**eTable 1.** Demographics and Patient Characteristics

**eTable 2.** Operative Details

**eTable 3.** Unanticipated Admissions

**eTable 4.** Short Form - 36

**eTable 5.** Adverse Events

**eTable 6.** Cost

This supplementary material has been provided by the authors to give readers additional information about their work.

eTable 1. Demographics and Patient Characteristics

|                                                                 | Laparoscopic<br>N=54 | Robotic<br>N=48 | P value      |
|-----------------------------------------------------------------|----------------------|-----------------|--------------|
| <b>Age at the assessment date, mean (SD)</b>                    | 57.2 (13.3)          | 56.1 (14.1)     | 0.678        |
| <b>Race</b>                                                     |                      |                 | 0.875        |
| Caucasian                                                       | 45                   | 40              |              |
| Hispanic                                                        | 1                    | 2               |              |
| African American                                                | 6                    | 5               |              |
| Asian/Pacific Islander                                          | 1                    | 0               |              |
| Other                                                           | 0                    | 1               |              |
| <b>Sex</b>                                                      |                      |                 | 0.744        |
| Male                                                            | 48                   | 44              |              |
| Female                                                          | 6                    | 4               |              |
| <b>BMI, mean (SD)</b>                                           | 26.9 (4.42)          | 24.9 (3.24)     | <b>0.014</b> |
| <b>Hypertension requiring medication, N (%)</b>                 | 17 (31.5)            | 18 (37.5)       | 0.667        |
| <b>Congestive heart failure, N (%)</b>                          | 2 (1.96)             | 1 (2.08)        | 1.000        |
| <b>Coronary artery disease, N (%)</b>                           | 6 (11.3)             | 6 (12.5)        | 1.000        |
| <b>Chronic obstructive pulmonary disease, N (%)</b>             | 1 (1.85)             | 0 (0.00)        | 1.000        |
| <b>Diabetes mellitus, N (%)</b>                                 | 4 (7.41)             | 2 (4.17)        | 0.681        |
| <b>Current Smoker (active within 1 month of surgery), N (%)</b> | 6 (11.3)             | 3 (6.25)        | 0.493        |
| <b>Chronic Immunosuppression, N (%)</b>                         | 3 (5.56)             | 0 (0.00)        | 0.246        |
| <b>Prior DVT, N (%)</b>                                         | 0 (0.00)             | 0 (0.00)        |              |
| <b>Prior PE, N (%)</b>                                          | 0 (0.00)             | 0 (0.00)        |              |
| <b>Recurrent Inguinal Hernia, N (%)</b>                         | 3 (5.56)             | 5 (10.6)        | 0.467        |
| <b>History of BPH or currently on BPH medications, N (%)</b>    | 6 (11.1)             | 5 (10.4)        | 1.000        |

eTable 2. Operative Details

|                                                                                        | Laparoscopic<br>N=54 | Robotic<br>N=48      | P<br>value |
|----------------------------------------------------------------------------------------|----------------------|----------------------|------------|
| Antibiotics Given According to SCIP Protocol, N (%)                                    | 54 (100)             | 48 (100)             |            |
| Type of Robot Used                                                                     |                      |                      |            |
| Si                                                                                     | N/A                  | 32                   |            |
| Xi                                                                                     | N/A                  | 16                   |            |
| Position of Robot Docking                                                              |                      |                      |            |
| Lithotomy                                                                              |                      | 2                    |            |
| Side/Parallel                                                                          |                      | 46                   |            |
| Size of Port # 1 Used (Umbilical), N (%)                                               |                      |                      | <0.00<br>1 |
| 5                                                                                      | 8 (14.8)             | 0 (0.00)             |            |
| 8                                                                                      | 0 (0.00)             | 14 (29.2)            |            |
| 10                                                                                     | 3 (5.56)             | 0 (0.00)             |            |
| 11                                                                                     | 3 (5.56)             | 6 (12.5)             |            |
| 12                                                                                     | 40 (74.1)            | 28 (58.3)            |            |
| Size of Port #2 Used (Lateral Right), N (%)                                            |                      |                      | <0.00<br>1 |
| 5                                                                                      | 49 (92.5)            | 1 (2.08)             |            |
| 8                                                                                      | 0 (0.00)             | 46 (95.8)            |            |
| 10                                                                                     | 1 (1.89)             | 0 (0.00)             |            |
| 12                                                                                     | 3 (5.66)             | 1 (2.08)             |            |
| Size of Port #3 Used (Lateral Left), N (%)                                             |                      |                      | <0.00<br>1 |
| 5                                                                                      | 51 (94.3)            | 2 (4.17)             |            |
| 8                                                                                      | 0 (0.00)             | 45 (93.8)            |            |
| 9                                                                                      | 0 (0.00)             | 1 (2.08)             |            |
| 10                                                                                     | 1 (1.89)             | 0 (0.00)             |            |
| 12                                                                                     | 2 (3.77)             | 0 (0.00)             |            |
| Assist Port Used                                                                       | 0 (0.00)             | 3 (6.67)             | 0.103      |
| Time from skin incision to closure, Median [25 <sup>th</sup> ; 75 <sup>th</sup> ]      | 40.5<br>[29.2;63.8]  | 75.5<br>[59.0;93.8]  | <0.00<br>1 |
| Docking of Robot, Median [25 <sup>th</sup> ; 75 <sup>th</sup> ]                        |                      | 5<br>[3.88;10.2]     |            |
| Time for Dissection of the Hernia, Median [25 <sup>th</sup> ; 75 <sup>th</sup> ]       | 13.0<br>[7.00;23.0]  | 18.0 [12.0;<br>27.0] | 0.012      |
| Time for Intraperitoneal Mesh Placement, Median [25 <sup>th</sup> ; 75 <sup>th</sup> ] | 3.00<br>[2.00;4.00]  | 3.00<br>[2.00;5.00]  | 0.279      |
| Time for Mesh Fixation, Median [25 <sup>th</sup> ; 75 <sup>th</sup> ]                  | 1.00<br>[1.00;3.00]  | 6.88<br>[5.00;9.00]  | <0.00<br>1 |

|                                                                                                |                       |                          |                  |
|------------------------------------------------------------------------------------------------|-----------------------|--------------------------|------------------|
| <b>Time for Peritoneal Closure, Median [25<sup>th</sup>; 75<sup>th</sup>]</b>                  | 2.00<br>[1.00;3.00]   | 7.00<br>[5.00;9.00]      | <b>&lt;0.001</b> |
| <b>Amount of IV Fluids Received, Median [25<sup>th</sup>; 75<sup>th</sup>]</b>                 | 600<br>[500;800]      | 800<br>[700;1050]        | <b>&lt;0.001</b> |
| <b>Side of Inguinal Hernia, N (%)</b>                                                          |                       |                          | 0.647            |
| <b>Right</b>                                                                                   | 28 (51.9)             | 28 (58.3)                |                  |
| <b>Left</b>                                                                                    | 26 (48.1)             | 20 (41.7)                |                  |
| <b>Type of Hernia, N (%)</b>                                                                   |                       |                          | 0.633            |
| <b>Direct</b>                                                                                  | 18 (33.3)             | 12 (25.0)                |                  |
| <b>Indirect</b>                                                                                | 31 (57.4)             | 31 (64.6)                |                  |
| <b>Both</b>                                                                                    | 5 (9.26)              | 5 (10.4)                 |                  |
| <b>Hernia size (cm), Median [25<sup>th</sup>; 75<sup>th</sup>]</b>                             | 3.00<br>[2.00;3.00]   | 3.00<br>[2.00;3.00]      | 0.975            |
| <b>Length of Mesh Used (cm), (Cranial – Caudal), Median [25<sup>th</sup>; 75<sup>th</sup>]</b> | 12.0<br>[12.0;15.0]   | 12.0<br>[12.0;15.0]      | 0.450            |
| <b>Width of Mesh Used (cm), (Medial - Lateral), Median [25<sup>th</sup>; 75<sup>th</sup>]</b>  | 15.0 [13.0;<br>15.0]  | 15.0<br>[12.0;15.0]      | 0.611            |
| <b>Mesh fixation</b>                                                                           |                       |                          |                  |
| <b>Number of Tacks Used, Median [25<sup>th</sup>; 75<sup>th</sup>]</b>                         | 4.00<br>[4.00;5.00]   | 6.00*<br>[6.00;6.00]     |                  |
| <b>Peritoneal closure</b>                                                                      |                       |                          |                  |
| <b>Type of Suture Material Used, N (%)</b>                                                     |                       |                          | 1.000            |
| <b>Absorbable</b>                                                                              | 4<br>(100)†           | 37<br>(86)               |                  |
| <b>Permanent</b>                                                                               | 0<br>(0.00)           | 6<br>(14.0)              |                  |
| <b>Number of tacks used for peritoneal closure, Median [25<sup>th</sup>; 75<sup>th</sup>]</b>  | 8.00 [6.00;<br>10.00] | 6.00<br>[6.00;6.00]<br>* |                  |

\*Tacks in the robotic group represent the patient who was converted to laparoscopic approach and whose data were analyzed using intention to treat principles

†Suture material in the laparoscopic group was utilized to close rents in the peritoneum distinct from the peritoneal flap

**eTable 3. Unanticipated admissions**

|                                                      | <b>Laparoscopic<br/>N=54</b> | <b>Robotic<br/>N=48</b> | <b>P value</b> |
|------------------------------------------------------|------------------------------|-------------------------|----------------|
| <b>Length of Hospital Stay (hours), median [IQR]</b> | 5.11 [4.00;7.00]             | 5.75 [5.00;7.00]        | 0.424          |
| <b>Unanticipated admission, N (%)</b>                | 2 (3.8)                      | 4 (8.3)                 | 0.420          |
| <b>Reason for admission, N (%)</b>                   |                              |                         | 1.000          |
| <b>Pain</b>                                          | 0                            | 1 (33.3)                |                |
| <b>Urinary retention</b>                             | 1 (50.0)                     | 0                       |                |
| <b>Other</b>                                         | 1 (50.0)                     | 2(66.7)                 |                |
| <b>Intervention for admission</b>                    |                              |                         | 1.000          |
| <b>Foley catheter placement</b>                      | 1 (50.0)                     | 0                       |                |
| <b>IV pain medication</b>                            | 0                            | 1 (33.3)                |                |
| <b>Other</b>                                         | 1 (50.0)                     | 2 (66.7)                |                |

**eTable 4. Short Form - 36**

| Time Point                                       | Preoperative |                |            | 1 week           |                  |            | 1 month         |               |            |
|--------------------------------------------------|--------------|----------------|------------|------------------|------------------|------------|-----------------|---------------|------------|
|                                                  | Lap<br>N=54  | Rob<br>N=47    | P<br>value | Lap<br>N=54      | Rob<br>N=47      | P<br>value | Lap<br>N=54     | Rob<br>N=47   | P<br>value |
| <b>Physical Functioning</b>                      | 80.6 (19.8)  | 83.7<br>(16.7) | 0.391      | -11.24<br>(22.3) | -11.68<br>(24.1) | 0.925      | 1.07<br>(17.2)  | 1.06 (17.4)   | 0.998      |
| <b>Role Limitations due to physical health</b>   | 66.7 (42.3)  | 76.1<br>(39.7) | 0.253      | -30.56<br>(49.2) | -34.57<br>(47.4) | 0.677      | -8.02<br>(48.3) | -20.74 (51.7) | 0.207      |
| <b>Role limitation due to emotional problems</b> | 86.4 (31.4)  | 89.3<br>(25.2) | 0.607      | -6.78<br>(39.6)  | -11.34<br>(37.0) | 0.551      | 1.22<br>(39.9)  | -5.62 (31.3)  | 0.338      |
| <b>Energy/fatigue</b>                            | 64.5 (19.7)  | 68.2<br>(17.1) | 0.321      | -3.24<br>(19.0)  | -3.89<br>(17.1)  | 0.856      | 0.56<br>(15.3)  | 0.96 (14.2)   | 0.892      |
| <b>Emotional Well-being</b>                      | 79.9 (14.2)  | 82.1<br>(12.1) | 0.387      | 1.44<br>(9.23)   | -0.77<br>(9.27)  | 0.234      | 3.85<br>(14.0)  | 2.64 (11.5)   | 0.633      |
| <b>Social Functioning</b>                        | 91.8(13.7)   | 92.4<br>(12.6) | 0.817      | -8.28<br>(22.3)  | -7.40<br>(17.2)  | 0.825      | -4.65<br>(22.1) | -0.74 (11.1)  | 0.256      |
| <b>Pain</b>                                      | 65.0 (27.5)  | 73.3<br>(24.5) | 0.111      | -12.59<br>(25.9) | -16.51<br>(24.8) | 0.440      | 6.06<br>(28.5)  | -2.85 (28.1)  | 0.118      |
| <b>General Health</b>                            | 79.3 (14.9)  | 80.7<br>(13.5) | 0.606      | -1.98<br>(13.4)  | -1.72<br>(9.57)  | 0.911      | -2.31<br>(12.4) | 1.55 (8.43)   | 0.067      |
| <b>Physical Component Summary</b>                | 48.1 (9.38)  | 50.4<br>(8.66) | 0.204      | -6.52<br>(8.50)  | -6.95<br>(8.64)  | 0.803      | -0.59<br>(8.91) | -1.98 (8.90)  | 0.434      |
| <b>Mental Component Summary</b>                  | 54.3 (7.83)  | 54.8<br>(6.77) | 0.734      | 0.80<br>(7.91)   | 0.00<br>(7.38)   | 0.598      | 0.65<br>(8.29)  | 0.71 (5.84)   | 0.965      |

**eTable 5. Adverse Events**

|                                            | <b>Laparoscopic<br/>N=54</b> | <b>Robotic<br/>N=48</b> | <b>P value</b> |
|--------------------------------------------|------------------------------|-------------------------|----------------|
| <b>Adverse Events, N (%)</b>               | 5 (9.3)                      | 8 (16.7)                | 0.374          |
| <b>Superficial SSI, N (%)</b>              | 1 (1.85)                     | 0 (0.00)                | >0.99          |
| <b>Purulent Drainage From Wound, N (%)</b> | 1 (1.85)                     | 0 (0.00)                | >0.99          |
| <b>Seroma, N (%)</b>                       | 3 (5.6)                      | 6 (12.5)                | 0.299          |
| <b>Hematoma, N (%)</b>                     | 0 (0.00)                     | 1 (2.08)                | 0.471          |
| <b>Required Intervention, N (%)</b>        | 1 (1.85)                     | 0 (0.00)                | 0.400          |
| <b>Oral Antibiotics, N (%)</b>             | 1 (1.85)                     | 0 (0.00)                | >0.99          |
| <b>Urinary Retention</b>                   | 1 (1.85)                     | 1 (2.08)                | >0.99          |

**eTable 6. Cost**

|                                                                               | <b>Laparoscopic<br/>N=54</b> | <b>Robotic<br/>N=48</b> | <b>P value</b> |
|-------------------------------------------------------------------------------|------------------------------|-------------------------|----------------|
| <b>Total Cost, Median<br/>[25<sup>th</sup>; 75<sup>th</sup>]</b>              | 1421 [1196;1930]             | 3258 [2568;4118]        | <0.001         |
| <b>OR Cost, Median<br/>[25<sup>th</sup>; 75<sup>th</sup>]</b>                 | 879 [714;1052]               | 1401 [1234;1933]        | <0.001         |
| <b>Disposable/Reusable<br/>Median Cost [25<sup>th</sup>; 75<sup>th</sup>]</b> | 578 [377;942]                | 1876 [1204;2364]        | <0.001         |
| <b>Total Cost, Mean</b>                                                       | 1854 (1838)                  | 3732 (2907)             | <0.001         |
| <b>OR Cost, Mean</b>                                                          | 1368 (1674)                  | 2141 (2099)             | 0.044          |
| <b>Disposable/Reusable Cost,<br/>Mean</b>                                     | 623 (434)                    | 1784 (1149)             | <0.001         |
| <b>Group, N%</b>                                                              |                              |                         | 0.625          |
| <b>Cleveland Clinic</b>                                                       | 21 (38.9%)                   | 14 (29.2%)              |                |
| <b>USC Greenville</b>                                                         | 12 (22.2%)                   | 15 (31.2%)              |                |
| <b>MCW</b>                                                                    | 5 (9.26%)                    | 5 (10.4%)               |                |
| <b>New Hanover</b>                                                            | 7 (13.0%)                    | 8 (16.7%)               |                |
| <b>Mt. Sinai</b>                                                              | 3 (5.56%)                    | 4 (*.33%)               |                |
| <b>Washington University<br/>in St. Louis</b>                                 | 6 (11.1%)                    | 2 (4.17%)               |                |
