# Supplementary material
Source: PubMed Central journal article supplement (PMC7081145)
Supplement: jamasurg-155-380-s003.pdf [file jamasurg-155-380-s003.pdf]

## **Data Sharing Statement**

Prabhu. Robotic Inguinal vs Transabdominal Laparoscopic Inguinal Hernia Repair. *JAMA Surg*. Published March 18, 2020.  
10.1001/jamasurg.2020.0034

### **Data**

**Data available:** No
